# Supplementary material for: A new analog of dihydroxybenzoic acid from Saccharopolyspora sp. KR21-0001
Source: publisher site journal article supplement (doi:10.3762/bjoc.20.44), 2024-02-29
Supplement: Additional file 1 [file 1860-5397-20-44-S1.pdf]

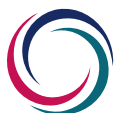

## Supporting Information

for

### **A new analog of dihydroxybenzoic acid from *Saccharopolyspora* sp. KR21-0001**

Rattiya Janthanom, Yuta Kikuchi, Hiroki Kanto, Tomoyasu Hirose, Arisu Tahara,  
Takahiro Ishii, Arinthip Thamchaipenet and Yuki Inahashi

*Beilstein J. Org. Chem.* **2024**, *20*, 497–503. [doi:10.3762/bjoc.20.44](https://doi.org/10.3762/bjoc.20.44)

## Additional data and NMR spectra

## Table contents

**Figure S1:**  $^1\text{H}$  NMR spectrum of KR21-0001A (**1**) in  $\text{CD}_3\text{OD}$

**Figure S2:**  $^{13}\text{C}$  NMR spectrum of KR21-0001A (**1**) in  $\text{CD}_3\text{OD}$

**Figure S3:** HMBC spectrum of KR21-0001A (**1**) in  $\text{CD}_3\text{OD}$

**Figure S4:** HSQC spectrum of KR21-0001A (**1**) in  $\text{CD}_3\text{OD}$

**Figure S5:**  $^1\text{H}, ^1\text{H}$  COSY spectrum of KR21-0001A (**1**) in  $\text{CD}_3\text{OD}$

**Figure S6:** De-sulfurization and hydrolyzation of KR21-0001A (**1**)

**Figure S7:** LC/MS analyses of the D-FDLA-derivatives

**Table S1:** Physicochemical properties of KR21-0001A (**1**)

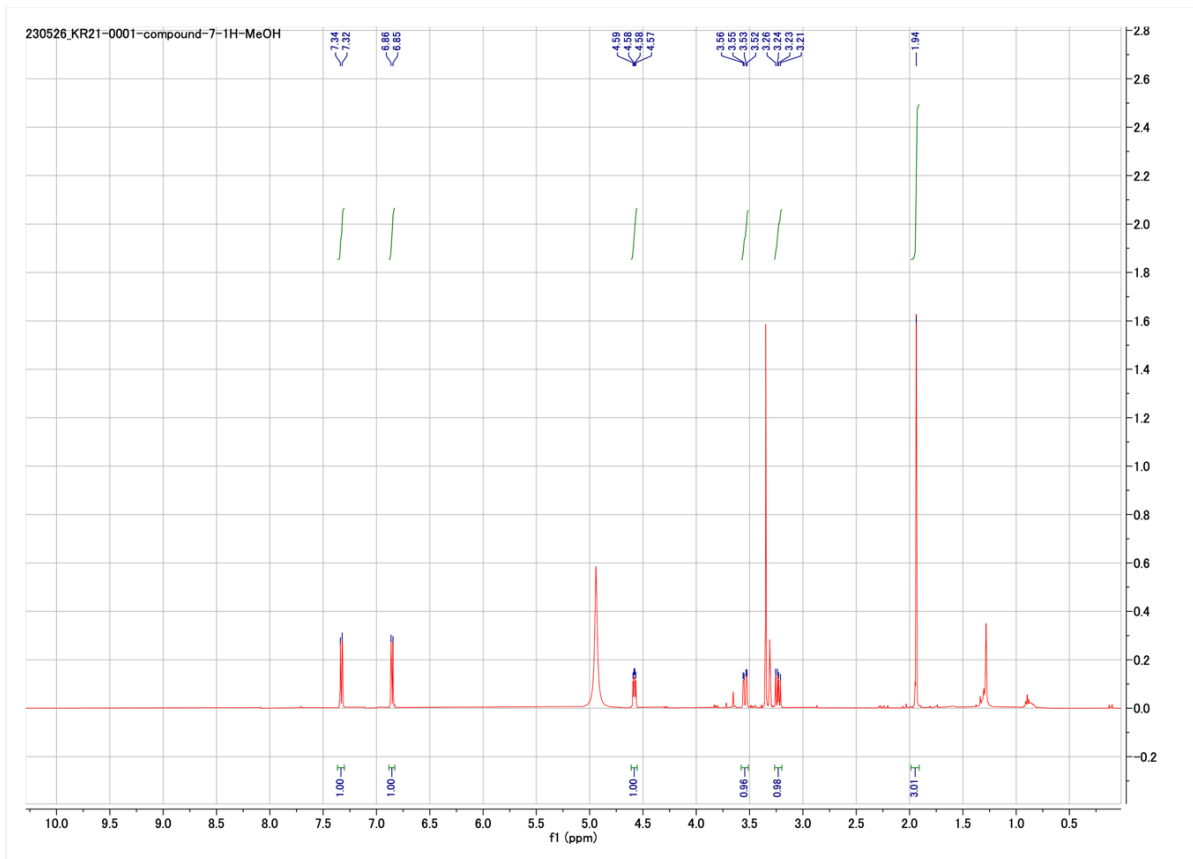

**Figure S1:**  $^1\text{H}$  NMR spectrum of KR21-0001A (**1**) in  $\text{CD}_3\text{OD}$ .

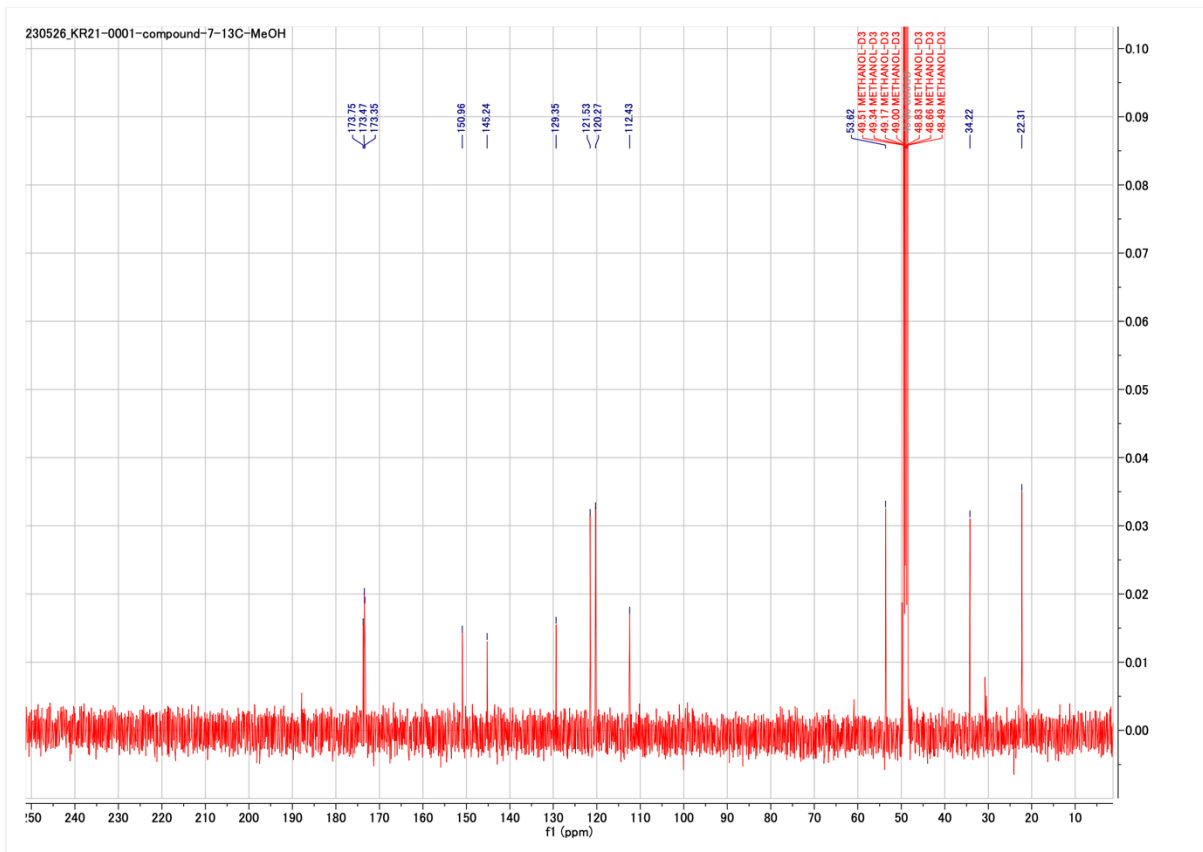

**Figure S2:**  $^{13}\text{C}$  NMR spectrum of KR21-0001A (**1**) in  $\text{CD}_3\text{OD}$ .

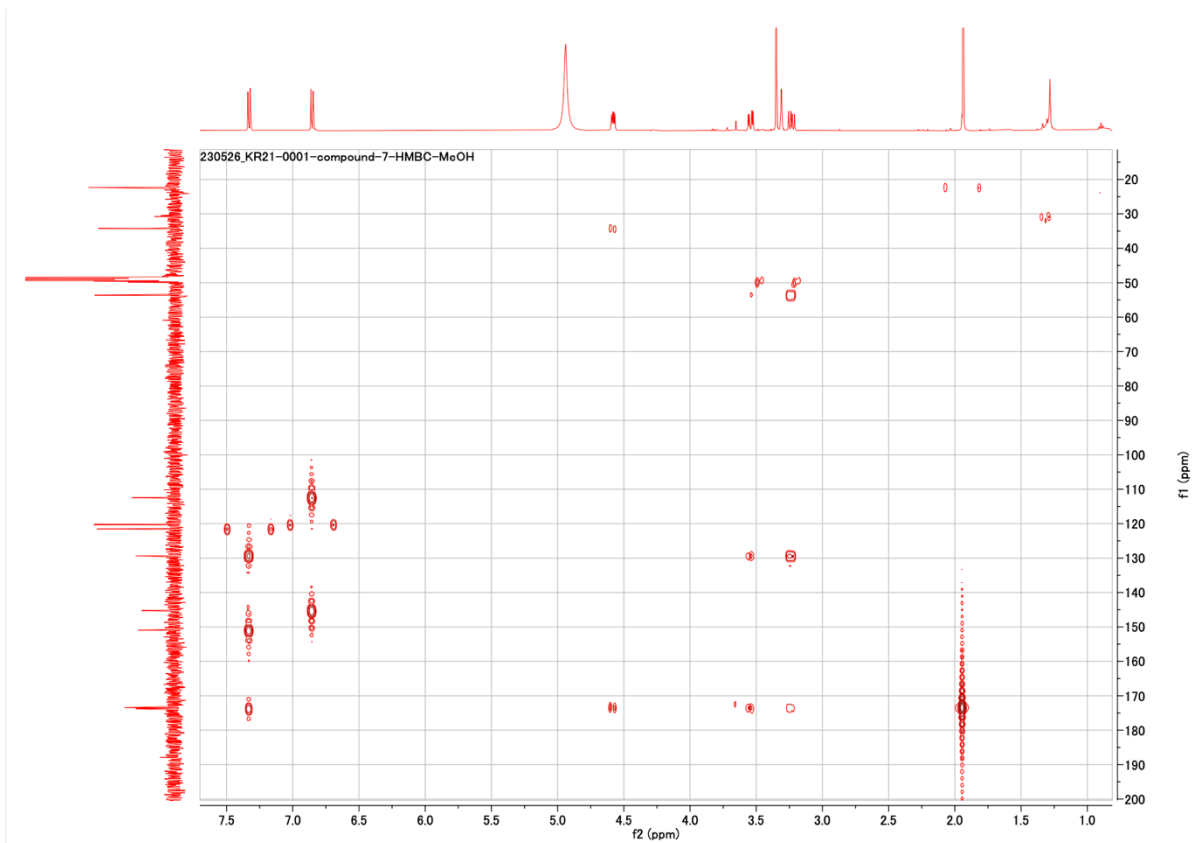

**Figure S3:** HMBC spectrum of KR21-0001A (**1**) in CD<sub>3</sub>OD.

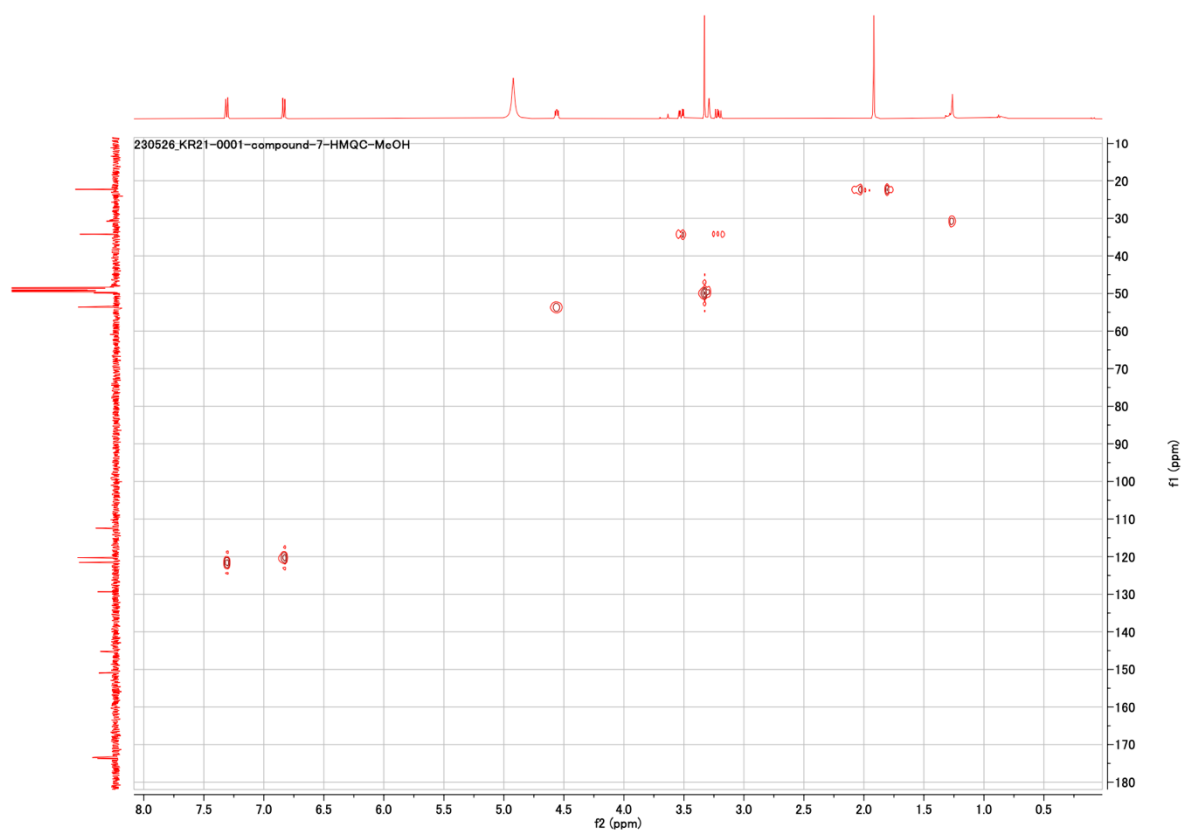

**Figure S4:** HMQC spectrum of KR21-0001A (**1**) in CD<sub>3</sub>OD.

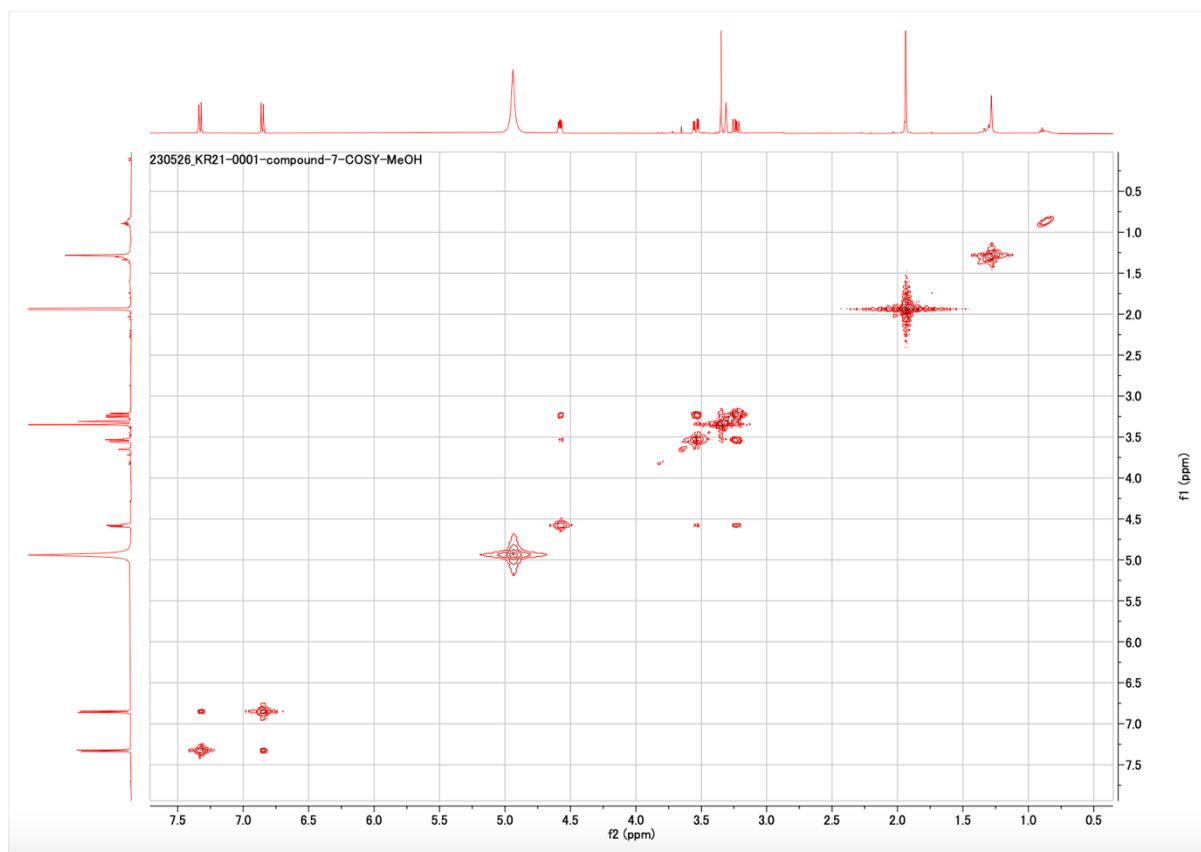

**Figure S5:**  $^1\text{H}, ^1\text{H}$  COSY spectrum of KR21-0001A (**1**) in  $\text{CD}_3\text{OD}$ .

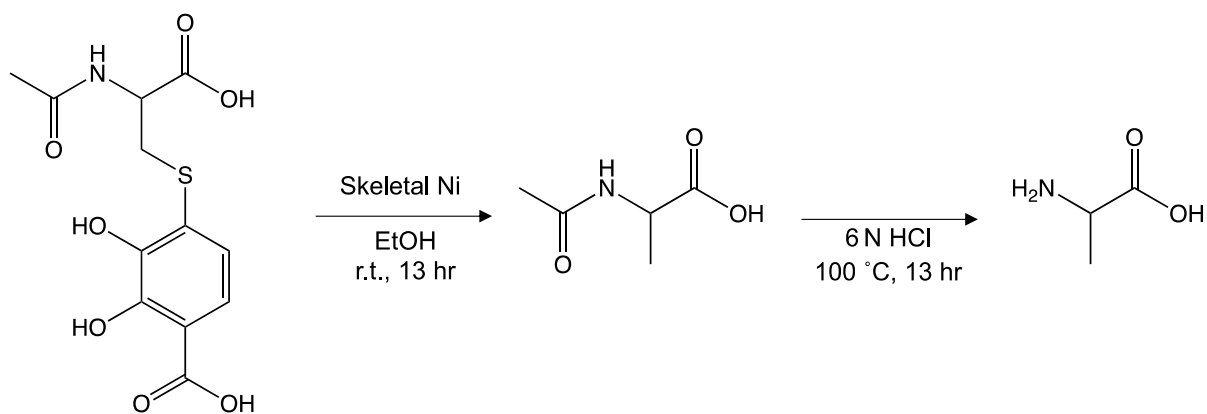

**Figure S6:** De-sulfurization and hydrolyzation of KR21-0001A (**1**).

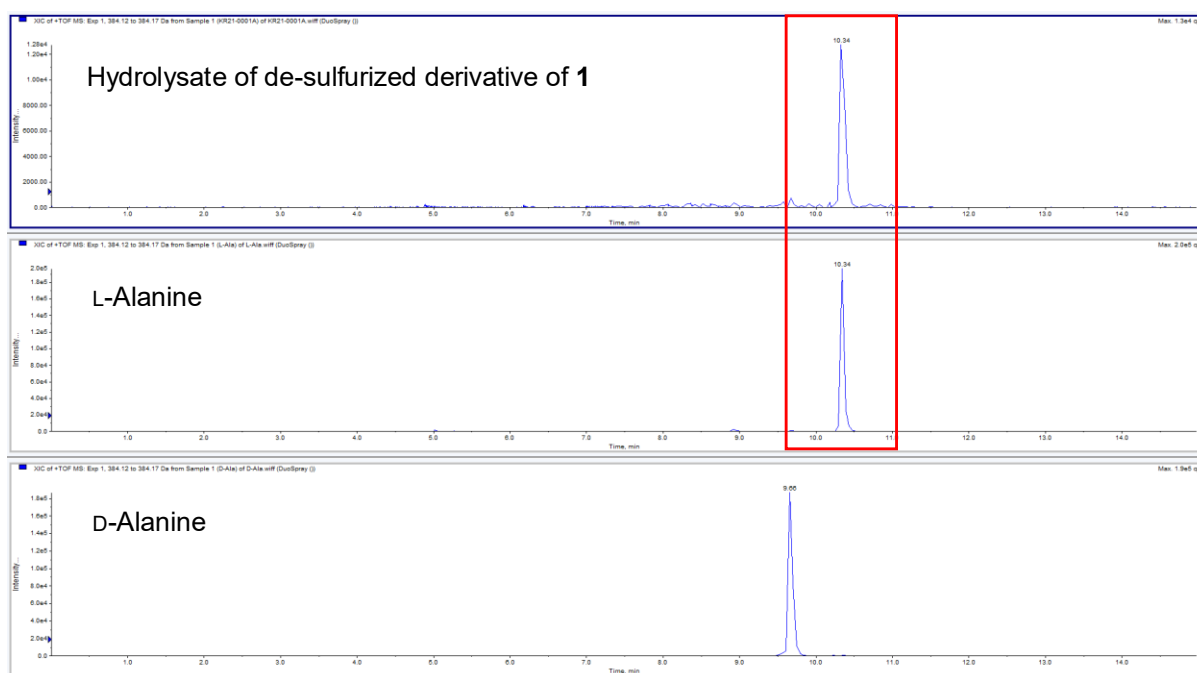

**Figure S7:** LC/MS analyses of the D-FDLA-derivatives.



**Table S1:** Physicochemical properties of KR21-0001A (**1**).

| Properties                                           | KR21-0001A                                                                                                                    |
|------------------------------------------------------|-------------------------------------------------------------------------------------------------------------------------------|
| Appearance                                           | Yellow oil                                                                                                                    |
| Molecular formula                                    | C <sub>12</sub> H <sub>13</sub> NO <sub>7</sub> S                                                                             |
| Molecular weight                                     | 315                                                                                                                           |
| HR-ESI-MS ( <i>m/z</i> )                             |                                                                                                                               |
| Calcd.                                               | 316.0485 [M+H] <sup>+</sup>                                                                                                   |
| Found                                                | 316.0484 [M+H] <sup>+</sup>                                                                                                   |
| UV <sub>max</sub> <sup>MeOH</sup> λ nm (ε)           | 215 (21389), 286 (10238)                                                                                                      |
| IR <i>v</i> cm <sup>-1</sup>                         | 3247, 2920, 2847, 2520, 1720, 1652, 1605, 1543, 1450, 1428, 1373, 1291, 1223, 1170, 1147, 1044, 1024, 982, 964, 905, 823, 750 |
| [α] <sub>D</sub> <sup>23</sup> ( <i>c</i> 0.1, MeOH) | -11.9                                                                                                                         |
| Soluble                                              | MeOH, DMSO                                                                                                                    |
